# Supplementary material for: Waste Citrus reticulata Assisted Preparation of Cobalt Oxide Nanoparticles for Supercapacitors
Source: MDPI journal article supplement (doi:10.3390/nano12234119), 2022-11-22
Supplement: s1 [file s1]

## Supporting Information

# Waste *Citrus reticulata* Assisted Preparation of Cobalt Oxide Nanoparticles for Supercapacitors

Rishabh Srivastava <sup>1,2</sup>, Shiva Bhardwaj <sup>1,2</sup>, Anuj Kumar <sup>3,\*</sup>, Rahul Singhal <sup>4</sup>, Jules Scanley <sup>5</sup>, Christine C. Broadbridge <sup>5</sup> and Ram K. Gupta <sup>2,6,\*</sup>

<sup>1</sup> Department of Physics, Pittsburg State University, Pittsburg, KS 66762, USA

<sup>2</sup> National Institute of Material Advancement, Pittsburg, KS 66762, USA

<sup>3</sup> Nano-Technology Research Laboratory, Department of Chemistry, GLA University, Mathura 281406, Uttar Pradesh, India

<sup>4</sup> Department of Physics and Engineering Physics, Central Connecticut State University, New Britain, CT 06050, USA

<sup>5</sup> Connecticut State Colleges and Universities (CSCU) Center for Nanotechnology, Southern Connecticut State University, New Haven, CT 06515, USA

<sup>6</sup> Department of Chemistry, Pittsburg State University, Pittsburg, KS 66762, USA

\* Correspondence: anuj.kumar@gla.ac.in (A.K.); ramguptamsu@gmail.com (R.K.G.)

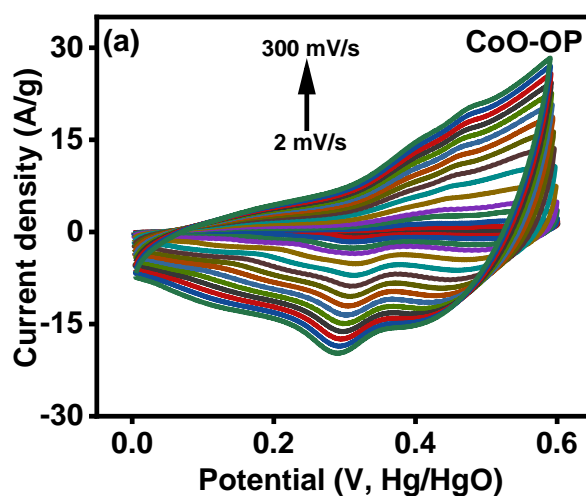

**Figure S1:** The CV scan curve from 2 to 300 mV/s for prepared (a) CoO-OP.

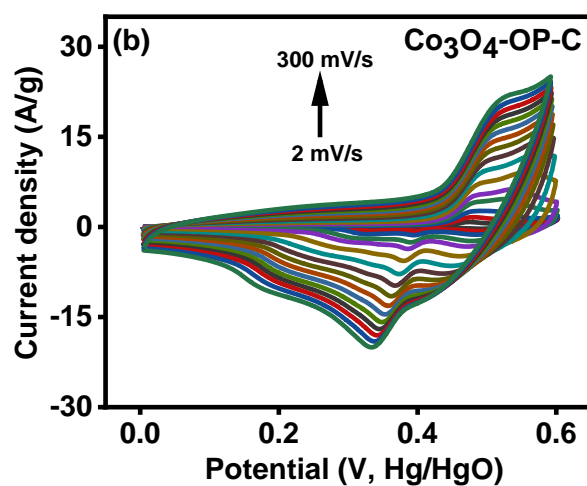

**Figure S2:** The CV scan curve from 2 to 300 mV/s for prepared (b)  $\text{Co}_3\text{O}_4\text{-OP-C}$ .

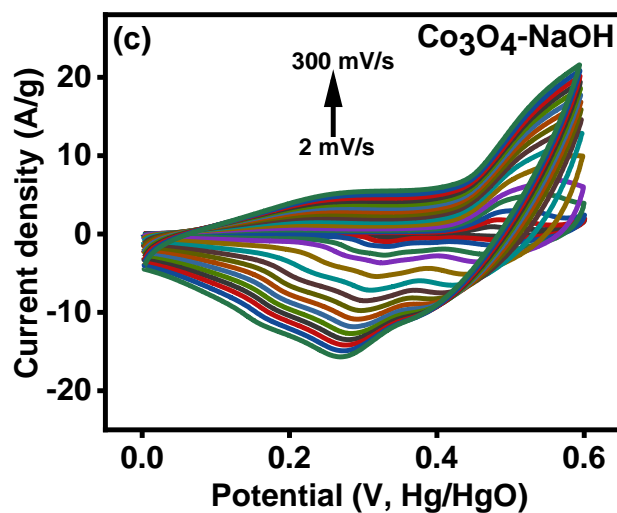

**Figure S3:** The CV scan curve from 2 to 300 mV/s for prepared (c)  $\text{Co}_3\text{O}_4\text{-NaOH}$ .

**Table S1:** The comparison between specific capacitance ( $C_{\text{sp}}$ ), power density, and energy density of the synthesized samples.

| Sample Name             | CoO-OP | $\text{Co}_3\text{O}_4\text{-OP-C}$ | $\text{Co}_3\text{O}_4\text{-NaOH}$ | CoO-S-OP | $\text{Co}_3\text{O}_4\text{-S-OP-C}$ | $\text{Co}_3\text{O}_4\text{-S-NaOH}$ | CoO-P-OP | $\text{Co}_3\text{O}_4\text{-P-OP-C}$ | $\text{Co}_3\text{O}_4\text{-P-NaOH}$ |
|-------------------------|--------|-------------------------------------|-------------------------------------|----------|---------------------------------------|---------------------------------------|----------|---------------------------------------|---------------------------------------|
| $C_{\text{sp}}$ @ 1 A/g | 90     | 53                                  | 89                                  | 98       | 87                                    | 101                                   | 185      | 100                                   | 131                                   |
| Power density (Wh/Kg)   | 292    | 286                                 | 284                                 | 289      | 290                                   | 294                                   | 296      | 293                                   | 293                                   |
| Energy density (W/Kg)   | 4.3    | 2.4                                 | 4.0                                 | 4.6      | 4.1                                   | 4.8                                   | 9.0      | 4.7                                   | 6.2                                   |
